# Supplementary material
Source: Springer Nature journal article supplement (https://www.springermedizin.de/resource/supplementary/12876_2007_317_MOESM2_ESM.pdf/9439152)

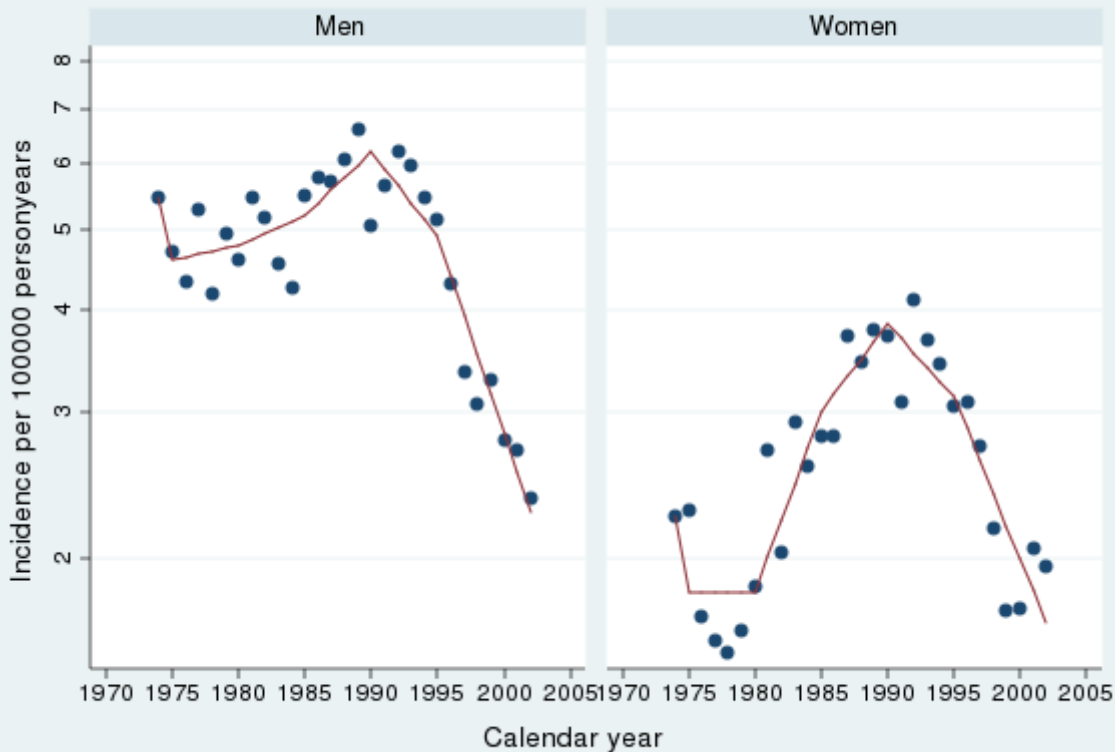

Graphs by kon

Supplement: MOESM2 [file 9439152]
